# Supplementary material for: Platinum(ii) diimine complexes of acetylides containing 7-azaindolyl and 2,2′-dipyridylamino functional groups
Source: Royal Society of Chemistry journal article supplement (doi:10.1039/b305408j), 2003-01-01

## Supporting information

Platinum(II) diimine complexes of Acetylides containing 7-azaindolyl and  
2,2'-dipyridylamino Functional groups

Youngjin Kang, Junghyun Lee, Datong Song, and Suning Wang\*

*Department of Chemistry, Queen's University, Kingston, Ontario K7L 3N6, Canada*

Fig 1. Emission spectra of **1-4** in solid state at 298K.

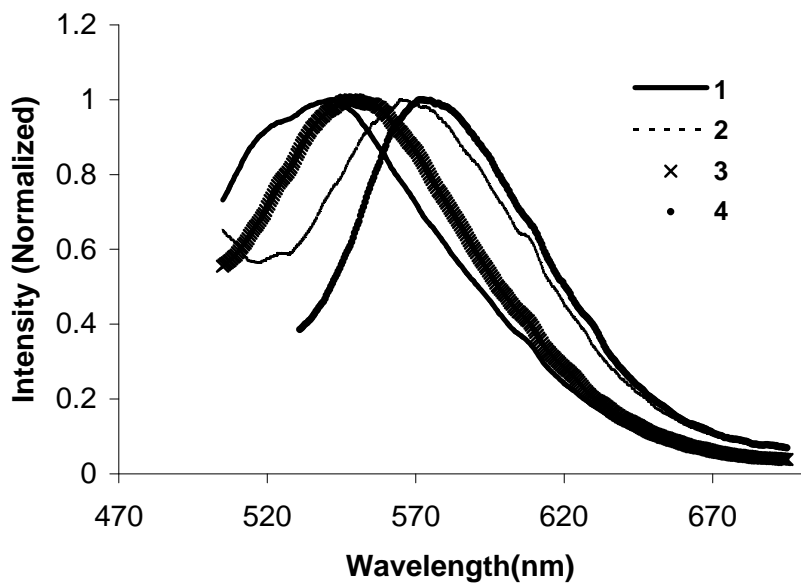

Fig 2 . Emission spectra of **1-4** in solid state at 77K.

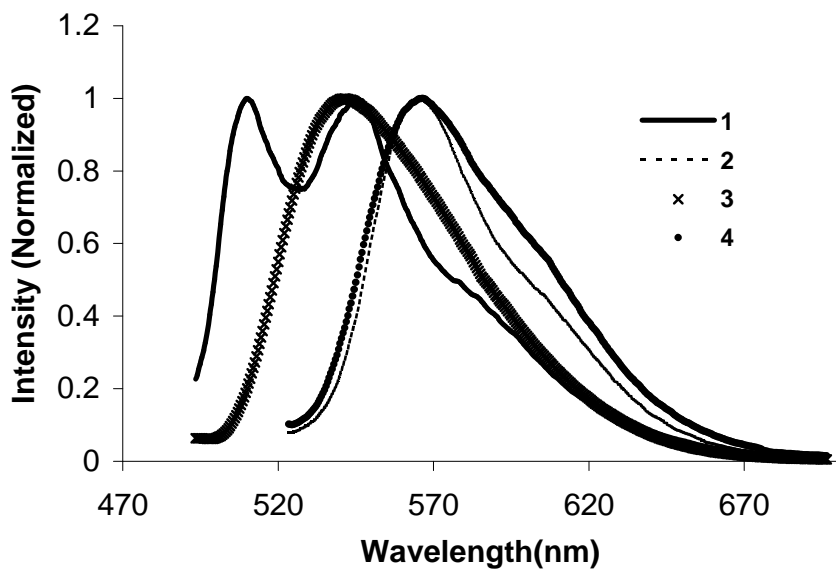

Fig. 3. A complete drawing showing the structure of **1** and the solvent molecules.

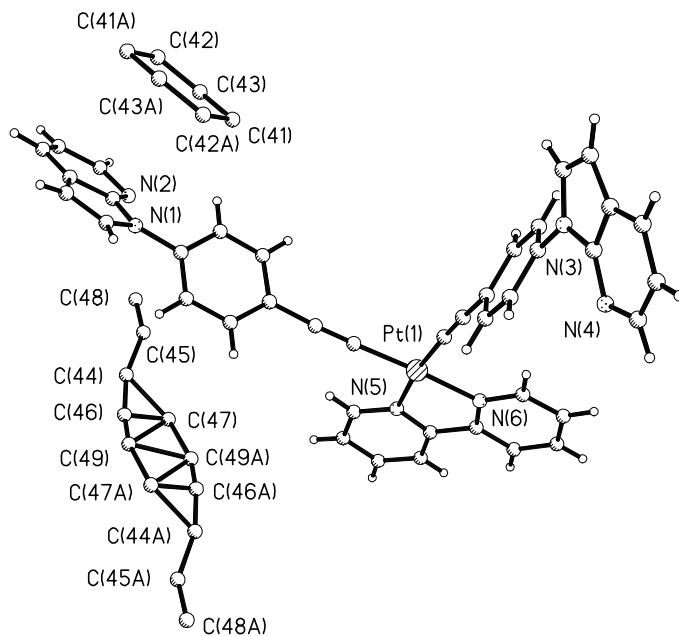

Fig. 4. A complete drawing showing the structure of **4** and the solvent molecules.

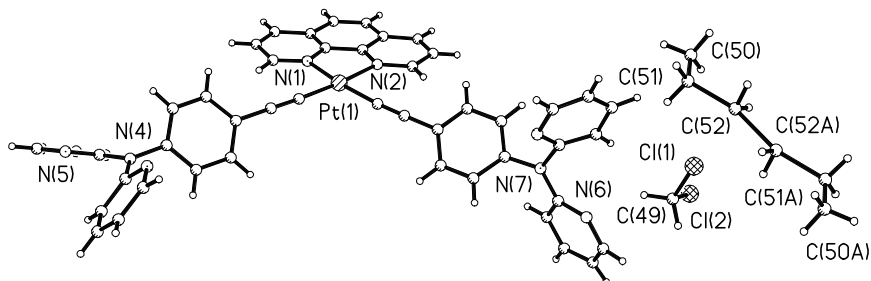

Figure 5. Unit cell packing diagram showing the location of solvent molecules in the crystal lattice of **1**.

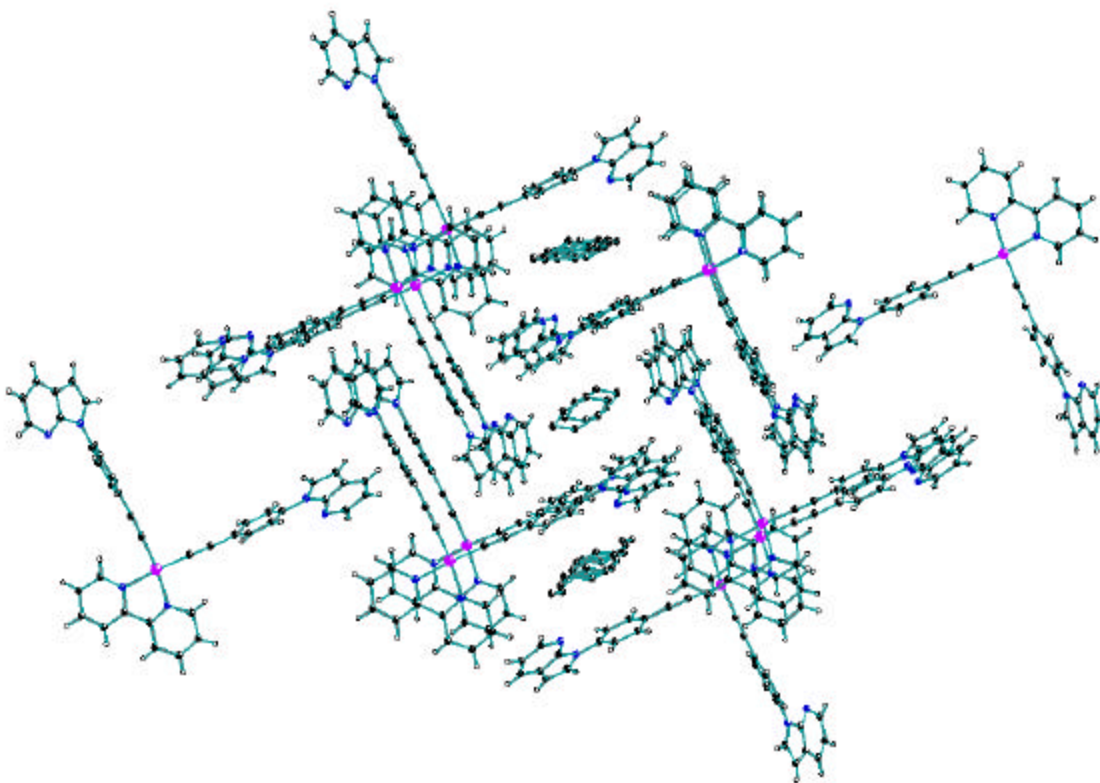

Figure 5. Unit cell packing diagram showing the location of solvent molecules in the crystal lattice of **4**.

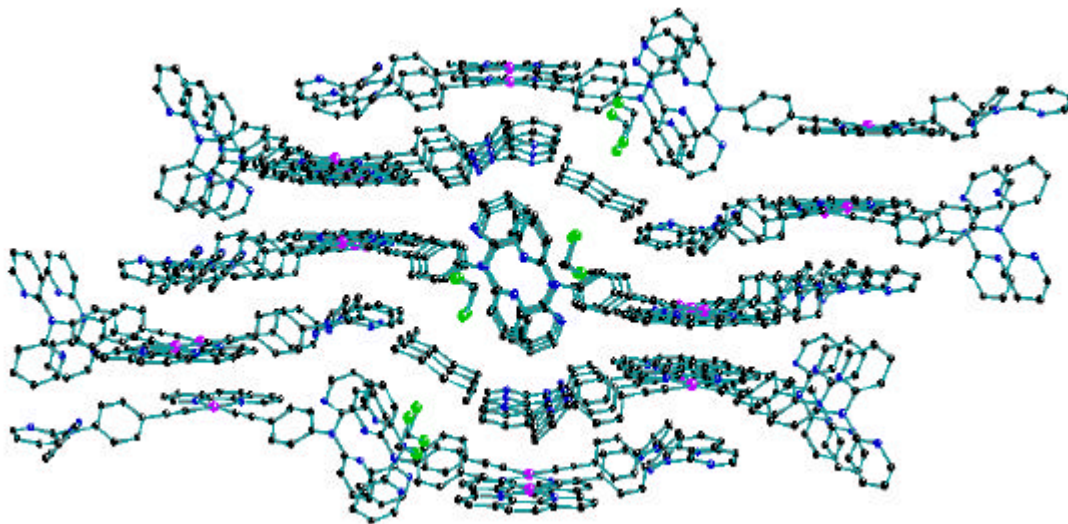

Supplement: b305408j.pdf [file b305408j.pdf]
